# Supplementary material for: Damage to the Testicular Structure of Rats by Acute Oral Exposure of Cadmium
Source: MDPI journal article supplement (doi:10.3390/ijerph18116038), 2021-06-04
Supplement: s1 [file s1]

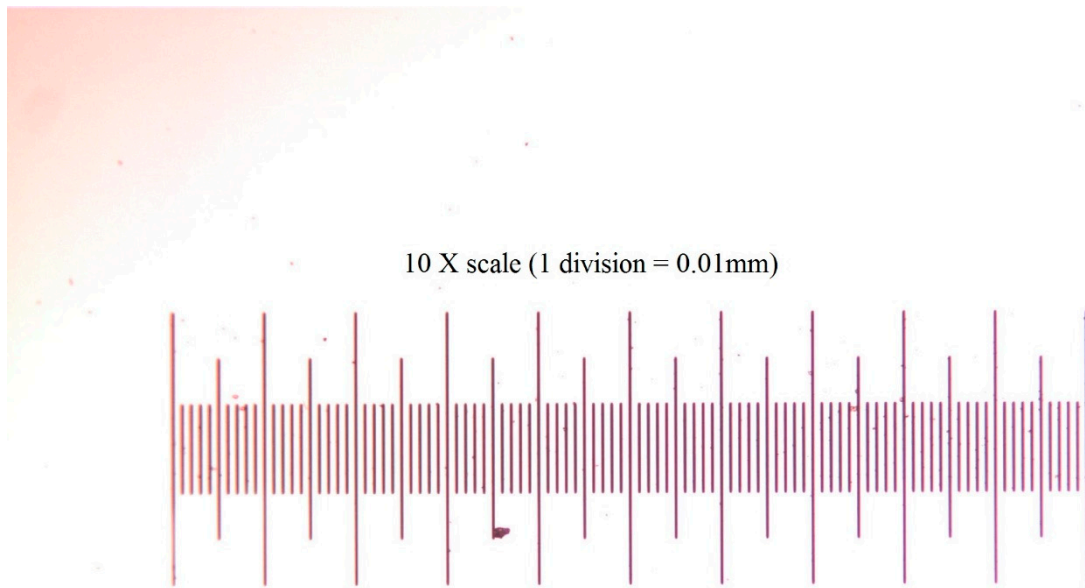

Supplemental figure: 10X scale for histological calculations

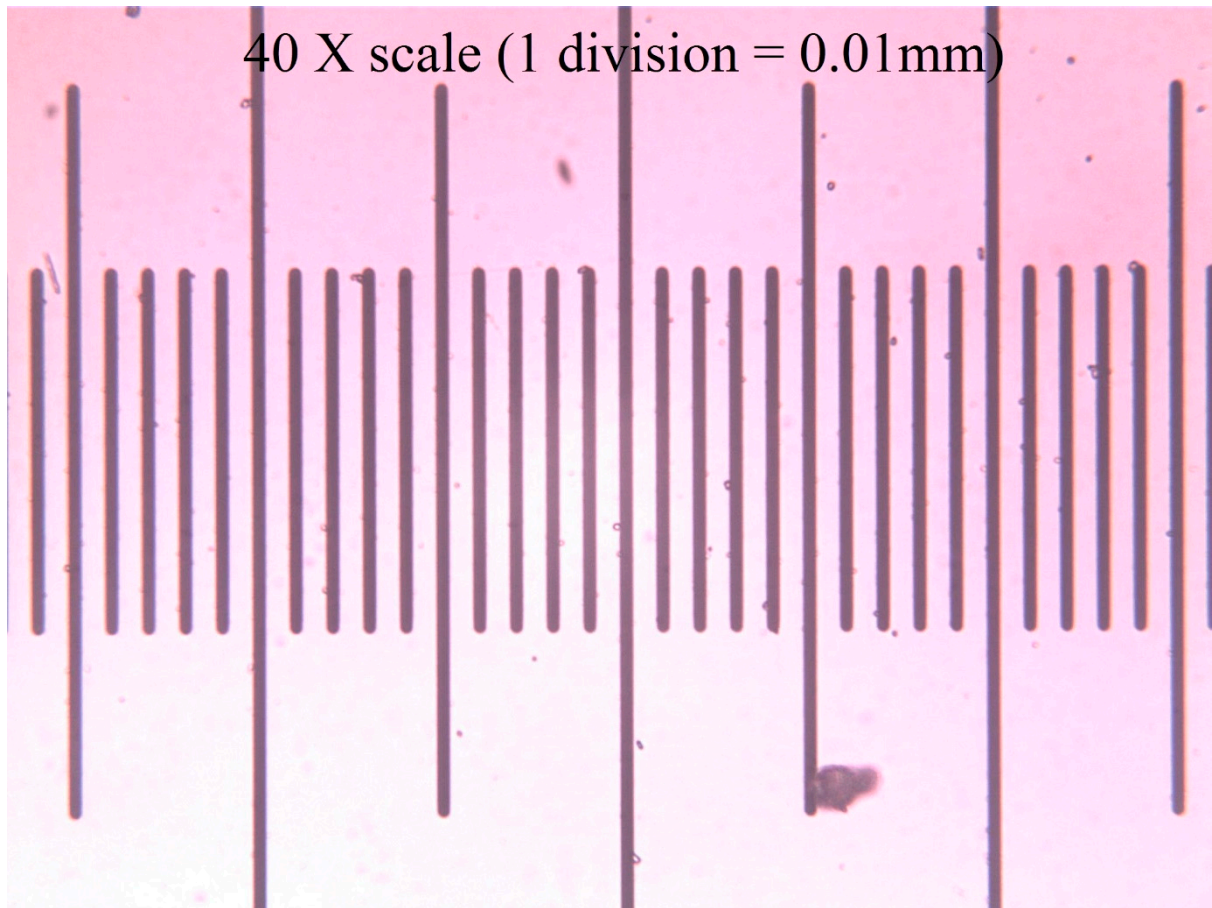

Supplemental figure: 40X scale for histological calculations
